# Supplementary material for: Optimization of Protocols for the Induction of Callus and Plant Regeneration in White Clover (Trifolium repens L.)
Source: MDPI journal article supplement (doi:10.3390/ijms241411260), 2023-07-09
Supplement: s1 [file s1]

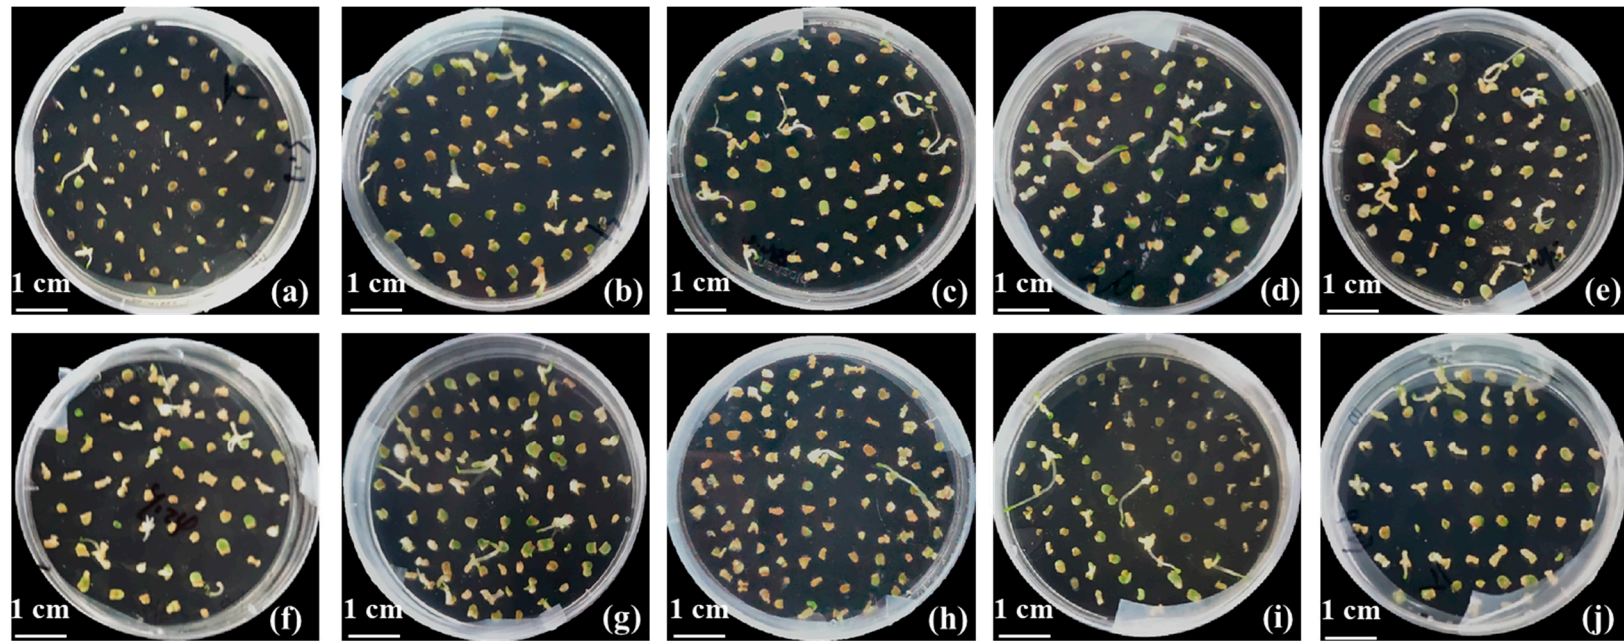

**Supplement Figure S1.** Calluses of different varieties of white clover at 20-days-old emerged from the cotyledon wounds. **(A)** Barbzan callus. **(B)** Koala callus. **(C)** HaHnony callus. **(D)** Ladino callus. **(E)** Sulky callus. **(F)** Haifa callus. **(G)** Miracle callus. **(H)** Pixie callus. **(I)** Zapican callus. **(J)** Mag callus.

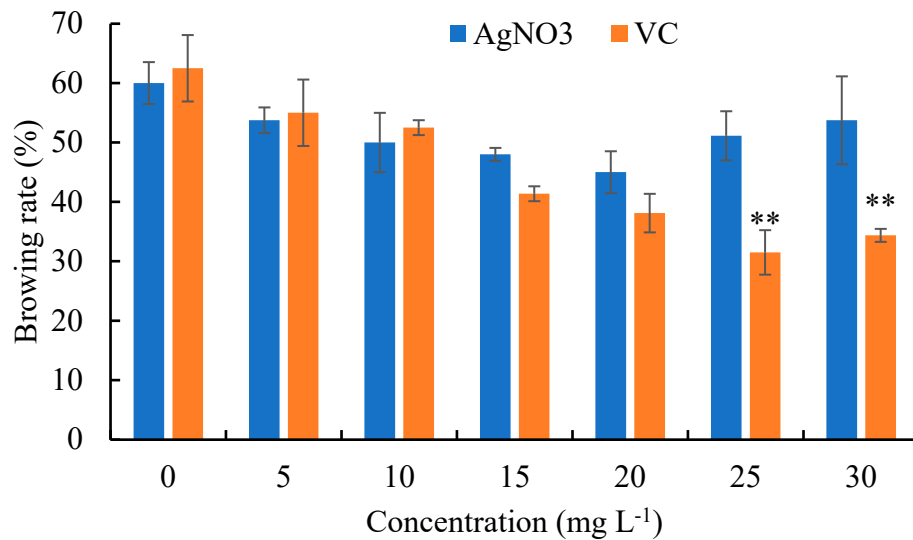

**Supplement Figure S2.** Comparison of AgNO<sub>3</sub> and VC for reducing browning rate at the same concentration gradient. “\*\*” was significant at the 0.01 level.

**Supplement Table S1.** Names and origins of the tested white clover varieties.

| Varieties | Amount | Seed source                         | Origin      |
|-----------|--------|-------------------------------------|-------------|
| Barbzan   | 1 kg   | Evergeen International Co., Ltd.    | Netherlands |
| Koala     | 1 kg   | Evergeen International Co., Ltd.    | Australia   |
| HaHnony   | 1 kg   | Evergeen International Co., Ltd.    | America     |
| Ladino    | 1 kg   | Evergeen International Co., Ltd.    | America     |
| Sulky     | 1 kg   | Evergeen International Co., Ltd.    | Argentina   |
| Haifa     | 1 kg   | Beijing Hope Turf Technogy Co., LTD | Australia   |
| Miracle   | 1 kg   | Evergeen International Co., Ltd.    | America     |
| Pixie     | 1 kg   | Evergeen International Co., Ltd.    | New Zealand |
| Zapican   | 1 kg   | Beijing Hope Turf Technogy Co., LTD | Argentina   |
| MAG       | 1 kg   | Beijing Hope Turf Technogy Co., LTD | Argentina   |

**Supplement Table S2.** Transformation efficiency statistics using the leaf explant protocol.

| Method              | Explants | Kan-resistant callus | Positive lines | Transformation Efficiency |
|---------------------|----------|----------------------|----------------|---------------------------|
| Article section 4.5 | 210      | 56                   | 5(8.9%)        | 2.38%                     |

**Supplement Table S3.** Culture medium composition for callus induction and differentiation

| Chemica                         | CCM<br>1000ml | CDM1<br>1000ml | CDM2<br>1000ml |
|---------------------------------|---------------|----------------|----------------|
| MS basal medium                 | 4.74 g        | 4.74 g         | 4.74 g         |
| Sucrose                         | 3 g           | 3 g            | 3 g            |
| Calcium gluconate               | 0.6 g         | 0.6 g          | 0.6 g          |
| pH                              | 5.8           | 5.8            | 5.8            |
| Plant Aga                       | 7 g           | 7 g            | 7 g            |
| 2,4-D stock solution (2 mg/ml)  | 1 ml          | 0              | 0              |
| 6-BA stock solution (0.5 mg/ml) | 1 ml          | 2 ml           | 0              |
| NAA stock solution (0.1 mg/ml)  | 0             | -              | 1 ml           |

**Supplement Table S4.** Medium composition for white clover callus induction and proliferation

| Chemica                                     | CIM<br>1000ml | CM<br>1000ml | CCM-S<br>1000ml | CDM-S<br>1000ml | CRM-S<br>1000ml |
|---------------------------------------------|---------------|--------------|-----------------|-----------------|-----------------|
| MS basal medium                             | 4.74 g        | 4.74 g       | 4.74 g          | 4.74 g          | 4.74 g          |
| Sucrose                                     | 3 g           | 3 g          | 3 g             | 3 g             | 3 g             |
| Calcium gluconate                           | 0.6 g         | 0.6 g        | 0.6 g           | 0.6 g           | 0.6 g           |
| pH                                          | 5.8           | 5.8          | 5.8             | 5.8             | 5.8             |
| Acetosyringone stock solution<br>(20 mg/ml) | 1 ml          | 1 ml         | 0               | 0               | 0               |
| Plant Agar                                  | 0             | 7 g          | 7 g             | 7 g             | 7 g             |
| Cefotaxime stock solution (300 mg/ml)       | 0             | 0            | 1 ml            | 1 ml            | 1 ml            |
| Blp stock solution (25 mg/ml)               | 0             | 0            | 1 ml            | 1 ml            | 1 ml            |
| 2,4-D stock solution (2 mg/ml)              | 1 ml          | 1 ml         | 1 ml            | 0               | 0               |
| 6-BA stock solution (0.5 mg/ml)             | 1 ml          | 1 ml         | 1 ml            | 2 ml            | 0               |
| NAA stock solution (0.1 mg/ml)              | 0             | 0            | 0               | 5 ml            | 1 ml            |
| KT stock solution (1 mg/ml)                 | 0             | 0            | 0               | 1 ml            | 0               |
